# Supplementary material for: Comparison of Periodontal Bacteria of Edo and Modern Periods Using Novel Diagnostic Approach for Periodontitis With Micro-CT
Source: Front Cell Infect Microbiol. 2021 Sep 20;11:723821. doi: 10.3389/fcimb.2021.723821 (PMC8488429; doi:10.3389/fcimb.2021.723821)
Supplement: Supplementary file 9 [file Table_8.xlsx]

## Sheet: TableS8 
Supplementary Table 8. Relative read abundances (%) of 16S rRNA reads in Edo samples assigned at class level (in the descending order of mean values)
Class used for assigning OTUs		EP1	EP2	EP3	EP4	EP5	Mean	SD	SE	Number of sample			EH1	EH2	EH3	EH4	EH5	EH6	EH7	Mean	SD	SE	Number of sample
Sample Type		Periodontitis	Periodontitis	Periodontitis	Periodontitis	Periodontitis							Healthy	Healthy	Healthy	Healthy	Healthy	Healthy	Healthy
Unclassified		58.2234	66.5126	83.7649	44.6945	54.1793	61.475	14.7275	6.58635	5		Unclassified	18.6975	24.4261	33.9171	67.552	44.6673	78.7012	19.2022	41.0234	23.9348	9.0465	7
Clostridia		30.8001	30.4036	11.8372	34.5338	23.6033	26.2356	8.96254	4.00817	5		Clostridia	27.6261	72.1691	53.8684	28.6488	23.1116	17.1917	50.7908	39.0581	20.1031	7.59827	7
Actinobacteria		6.13863	1.78235	2.836	17.492	16.5006	8.94992	7.52724	3.36628	5		Actinobacteria	19.2227	1.62548	6.13768	2.17377	20.5322	2.96742	16.2351	9.84206	8.47	3.20136	7
Alphaproteobacteria		3.82217	0.367786	0.123305	0	0	0.862651	1.66122	0.74292	3		Betaproteobacteria	6.67017	0.307523	1.78191	1.26198	2.62027	0.247285	0.503849	1.91328	2.26972	0.857873	7
Betaproteobacteria		0.356379	0.0754432	0.123305	1.28617	0.909485	0.550157	0.528191	0.236214	5		Synergistia	8.14076	0	0	0	1.45343	0	1.72148	1.61652	2.97366	1.12394	3
Bacilli		0.115823	0.0848736	0.164406	1.67203	0.433088	0.494043	0.672772	0.300873	5		Bacilli	3.04622	0.21966	2.72617	0.178394	2.04708	0.666595	0.209937	1.29915	1.26859	0.479482	7
Anaerolineae		0.0445474	0	0	0	1.86228	0.381365	0.82808	0.370329	2		TM7 [C-1]	2.9937	0.0329489	0	0	0	0	3.89083	0.988211	1.69637	0.641166	3
Coriobacteriia		0	0.22633	0	0	1.25595	0.296457	0.545256	0.243846	2		Alphaproteobacteria	2.20588	0	0.822419	0.0925008	3.02968	0.0215031	0.26592	0.919701	1.21656	0.459815	6
Gammaproteobacteria		0.160371	0	0.328812	0	0.952793	0.288395	0.395535	0.176889	3		Bacteroidia	2.31092	0.505217	0	0	2.53838	0.0430061	0.139958	0.79107	1.13136	0.427615	5
Flavobacteriia		0	0	0.739827	0	0	0.147965	0.330861	0.147965	1		Anaerolineae	0	0.395387	0.502589	0	0	0.118267	3.91882	0.70501	1.43183	0.541181	4
TM7 [C-1]		0.151461	0.377216	0	0	0	0.105735	0.165327	0.0739366	2		Gammaproteobacteria	2.88866	0.153762	0	0	0	0.0430061	0	0.440775	1.08088	0.408535	3
Spirochaetia		0	0	0	0.321543	0	0.0643087	0.143799	0.0643087	1		Coriobacteriia	0	0.153762	0	0	0	0	2.82715	0.425845	1.06043	0.400803	2
Bacteroidia		0	0	0	0	0.303162	0.0606323	0.135578	0.0606323	1		Epsilonproteobacteria	2.83613	0.010983	0	0	0	0	0	0.406731	1.07127	0.404904	2
Mollicutes		0.106914	0.169747	0	0	0	0.0553322	0.0789564	0.0353104	2		Erysipelotrichia	1.89076	0	0	0.0594648	0	0	0	0.278603	0.711238	0.268823	2
Synergistia		0.0801853	0	0.082203	0	0	0.0324777	0.0444776	0.019891	2		Spirochaetia	1.47059	0	0.24368	0	0	0	0.181945	0.270888	0.538741	0.203625	3
Total		100	100	100	100	100						Sphingobacteriia	0	0	0	0	0	0	0.111966	0.0159952	0.0423193	0.0159952	1
												Mollicutes	0	0	0	0.033036	0	0	0	0.00471943	0.0124864	0.00471943	1
												Total	100	100	100	100	100	100	100
