# Supplementary material for: Comparison of Periodontal Bacteria of Edo and Modern Periods Using Novel Diagnostic Approach for Periodontitis With Micro-CT
Source: Front Cell Infect Microbiol. 2021 Sep 20;11:723821. doi: 10.3389/fcimb.2021.723821 (PMC8488429; doi:10.3389/fcimb.2021.723821)
Supplement: Supplementary file 15 [file Table_14.xlsx]

## Sheet: TableS14 
Supplementary Table 14. SparCC coefficients in Edo samples with periodontitis
Taxa at the species level	Actinomyces oricola	Actinomyces sp. oral taxon 525	Anaerolineae [G-1] sp. oral taxon 439	Bacteroidaceae [G-1] sp. oral taxon 272	Bergeyella sp. oral taxon 422	Bosea vestrisii	Clostridiales [F-3][G-1] sp. oral taxon 876	Eggerthella lenta	Fretibacterium fastidiosum	Lactobacillus iners	Microbacterium flavescens	Mogibacterium timidum	Mollicutes [G-2] sp. oral taxon 906	Olsenella sp. oral taxon 807	Paenibacillus sp. oral taxon 048	Peptostreptococcaceae [XI][G-1] sp. oral taxon 383	Peptostreptococcaceae [XI][G-5] [Eubacterium] saphenum	Peptostreptococcaceae [XI][G-6] [Eubacterium] minutum	Peptostreptococcaceae [XI][G-6] [Eubacterium] nodatum	Pseudoramibacter alactolyticus	Sphingomonas echinoides	Syntrophomonadaceae [VIII][G-1] sp. oral taxon 435	TM7 [G-1] sp. oral taxon 488	Treponema socranskii
Actinomyces oricola	1	-0.117	0.293	0.035	-0.127	0.218	-0.223	0.521	-0.166	0.127	0.042	-0.263	-0.383	0.136	-0.143	-0.079	-0.091	-0.118	-0.168	-0.166	-0.301	-0.336	0.133	-0.173
Actinomyces sp. oral taxon 525	-0.117	1	0.089	-0.008	-0.16	0.143	-0.394	-0.301	0.205	-0.074	0.008	-0.018	-0.366	-0.011	-0.041	-0.273	-0.041	0.2	0.205	-0.149	0.362	-0.274	-0.121	0.039
Anaerolineae [G-1] sp. oral taxon 439	0.293	0.089	1	-0.183	-0.148	-0.059	0.099	0.264	0.081	0.007	-0.114	0.171	-0.192	0.347	-0.317	0.084	0.008	-0.029	-0.072	-0.062	-0.421	-0.63	0.054	0.485
Bacteroidaceae [G-1] sp. oral taxon 272	0.035	-0.008	-0.183	1	-0.428	-0.06	0.27	-0.09	-0.289	0.419	0.184	0	-0.004	-0.166	0.03	-0.037	0.093	0.064	0.22	0.034	0.116	0.208	0.313	-0.309
Bergeyella sp. oral taxon 422	-0.127	-0.16	-0.148	-0.428	1	-0.5	0.04	0.195	-0.114	0.26	-0.062	-0.023	0.387	0.218	0.132	-0.208	-0.121	-0.303	0.307	-0.251	0.114	0.014	0.061	-0.087
Bosea vestrisii	0.218	0.143	-0.059	-0.06	-0.5	1	-0.265	-0.09	0.048	0.287	0.089	0.134	-0.028	0.307	0.169	-0.134	0.325	-0.079	-0.166	-0.148	0.326	-0.055	0.043	0.015
Clostridiales [F-3][G-1] sp. oral taxon 876	-0.223	-0.394	0.099	0.27	0.04	-0.265	1	-0.258	0.401	-0.321	-0.156	0.121	0.228	-0.003	0.317	-0.253	0.138	-0.038	0.063	0.031	0.174	-0.006	0.214	-0.196
Eggerthella lenta	0.521	-0.301	0.264	-0.09	0.195	-0.09	-0.258	1	-0.118	-0.041	-0.238	0.082	-0.171	0.131	-0.033	0.223	-0.25	0.001	0.135	-0.206	-0.182	-0.035	-0.112	0.118
Fretibacterium fastidiosum	-0.166	0.205	0.081	-0.289	-0.114	0.048	0.401	-0.118	1	-0.305	-0.048	0.127	0.193	0.07	0.18	0.158	0.335	0.083	-0.138	0.002	0.27	-0.418	-0.178	0.192
Lactobacillus iners	0.127	-0.074	0.007	0.419	0.26	0.287	-0.321	-0.041	-0.305	1	0.114	-0.275	-0.182	0.076	0.062	0.141	-0.038	0.24	-0.27	0.187	0.207	0.15	-0.145	-0.035
Microbacterium flavescens	0.042	0.008	-0.114	0.184	-0.062	0.089	-0.156	-0.238	-0.048	0.114	1	-0.174	-0.376	-0.392	0.174	0.648	-0.171	0.355	-0.099	0.647	-0.454	-0.281	0.091	-0.419
Mogibacterium timidum	-0.263	-0.018	0.171	0	-0.023	0.134	0.121	0.082	0.127	-0.275	-0.174	1	0.181	0.121	-0.32	0.02	0.386	-0.115	0.173	-0.383	-0.252	0.095	-0.162	0.061
Mollicutes [G-2] sp. oral taxon 906	-0.383	-0.366	-0.192	-0.004	0.387	-0.028	0.228	-0.171	0.193	-0.182	-0.376	0.181	1	-0.308	-0.569	-0.568	0.458	0.094	0.26	-0.221	0.384	0.425	0.373	0.028
Olsenella sp. oral taxon 807	0.136	-0.011	0.347	-0.166	0.218	0.307	-0.003	0.131	0.07	0.076	-0.392	0.121	-0.308	1	-0.184	-0.498	-0.059	-0.275	0.002	0.213	0.005	0.051	-0.222	0.372
Paenibacillus sp. oral taxon 048	-0.143	-0.041	-0.317	0.03	0.132	0.169	0.317	-0.033	0.18	0.062	0.174	-0.32	-0.569	-0.184	1	0.37	0.155	-0.293	0.189	0.159	0.275	-0.13	-0.062	-0.274
Peptostreptococcaceae [XI][G-1] sp. oral taxon 383	-0.079	-0.273	0.084	-0.037	-0.208	-0.134	-0.253	0.223	0.158	0.141	0.648	0.02	-0.568	-0.498	0.37	1	-0.046	-0.1	-0.357	0.665	-0.202	-0.324	-0.046	-0.1
Peptostreptococcaceae [XI][G-5] [Eubacterium] saphenum	-0.091	-0.041	0.008	0.093	-0.121	0.325	0.138	-0.25	0.335	-0.038	-0.171	0.386	0.458	-0.059	0.155	-0.046	1	-0.281	-0.072	-0.041	0.228	-0.078	-0.253	-0.151
Peptostreptococcaceae [XI][G-6] [Eubacterium] minutum	-0.118	0.2	-0.029	0.064	-0.303	-0.079	-0.038	0.001	0.083	0.24	0.355	-0.115	0.094	-0.275	-0.293	-0.1	-0.281	1	-0.11	0.116	-0.128	0.688	0.365	-0.175
Peptostreptococcaceae [XI][G-6] [Eubacterium] nodatum	-0.168	0.205	-0.072	0.22	0.307	-0.166	0.063	0.135	-0.138	-0.27	-0.099	0.173	0.26	0.002	0.189	-0.357	-0.072	-0.11	1	-0.432	-0.146	0.049	0.004	0.361
Pseudoramibacter alactolyticus	-0.166	-0.149	-0.062	0.034	-0.251	-0.148	0.031	-0.206	0.002	0.187	0.647	-0.383	-0.221	0.213	0.159	0.665	-0.041	0.116	-0.432	1	-0.029	0.177	0.061	-0.33
Sphingomonas echinoides	-0.301	0.362	-0.421	0.116	0.114	0.326	0.174	-0.182	0.27	0.207	-0.454	-0.252	0.384	0.005	0.275	-0.202	0.228	-0.128	-0.146	-0.029	1	0.273	-0.221	-0.232
Syntrophomonadaceae [VIII][G-1] sp. oral taxon 435	-0.336	-0.274	-0.63	0.208	0.014	-0.055	-0.006	-0.035	-0.418	0.15	-0.281	0.095	0.425	0.051	-0.13	-0.324	-0.078	0.688	0.049	0.177	0.273	1	0.352	-0.002
TM7 [G-1] sp. oral taxon 488	0.133	-0.121	0.054	0.313	0.061	0.043	0.214	-0.112	-0.178	-0.145	0.091	-0.162	0.373	-0.222	-0.062	-0.046	-0.253	0.365	0.004	0.061	-0.221	0.352	1	-0.012
Treponema socranskii	-0.173	0.039	0.485	-0.309	-0.087	0.015	-0.196	0.118	0.192	-0.035	-0.419	0.061	0.028	0.372	-0.274	-0.1	-0.151	-0.175	0.361	-0.33	-0.232	-0.002	-0.012	1
